# Supplementary material for: Experimental and computational evaluation of the barrier to torsional rotation in a butadiyne-linked porphyrin dimer
Source: Royal Society of Chemistry journal article supplement (doi:10.1039/c5cp06167a), 2016-01-01
Supplement: c5cp06167a1.pdf [file c5cp06167a1.pdf]

## ***Electronic Supplementary Information for:***

### **Experimental and Computational Evaluation of the Barrier to Torsional Rotation in a Butadiyne-Linked Porphyrin Dimer**

Martin D. Peeks, Patrik Neuhaus and Harry L. Anderson\*

*Department of Chemistry, University of Oxford, Chemistry Research Laboratory,  
Oxford, OX1 3TA, UK. E-mail: [harry.anderson@chem.ox.ac.uk](mailto:harry.anderson@chem.ox.ac.uk);  
Fax: +44 (0)1865 285002; Tel: +44 (0)1865 275704*

#### **Table of Contents**

|                                                                                                                                                                                                                             |           |
|-----------------------------------------------------------------------------------------------------------------------------------------------------------------------------------------------------------------------------|-----------|
| <b>UV-Vis extinction coefficients and peak maxima of P2 in DCM/THF/pyridine 10/10/1: .....</b>                                                                                                                              | <b>S2</b> |
| <b>Figure S1:</b> VT UV-Vis spectra of monomer <b>P1</b> in DCM/THF/pyridine 10/10/1, (a) full spectrum in temperature range 298–77 K (b) expansion of Q-band region in temperature range 298–163 K. ....                   | <b>S2</b> |
| <b>Figure S2:</b> TD-DFT (B3LYP/6-31G*/LANL2DZ) calculated excitation energies and oscillator strengths for <b>P2</b> (model <b>1d</b> ) as a function of inter-porphyrin torsion angle.....                                | <b>S2</b> |
| <b>Figure S3:</b> Normal modes of $S_1$ state of <b>P2</b> (model <b>1e</b> ) associated with major vibronic bands (main text Figure 6).....                                                                                | <b>S3</b> |
| <b>Figure S4:</b> Natural transition orbitals (NTOs) for $S_0$ – $S_1$ transition calculated (TD-B3LYP/6-31G*) for model <b>1e</b> . The eigenvalue associated with each NTO hole/electron pair is shown as $\lambda$ ..... | <b>S4</b> |
| <b>Figure S5:</b> DFT (B3LYP/6-31G*/LANL2DZ) HOMO and LUMO for <b>P2</b> (model <b>1d</b> ) as a function of interporphyrin torsion angle, 0–40°.....                                                                       | <b>S5</b> |
| <b>Figure S6:</b> DFT (B3LYP/6-31G*/LANL2DZ) HOMO and LUMO for <b>P2</b> (model <b>1d</b> ) as a function of interporphyrin torsion angle, 50–90°.....                                                                      | <b>S6</b> |
| <b>Figure S7:</b> Absorption (blue) and fluorescence (green) of <b>P2</b> (DCM + 1% pyridine). $\lambda_{\text{ex}} = 450$ nm...                                                                                            | <b>S7</b> |
| <b>Figure S8:</b> Absorption (blue) and fluorescence (green) of <b>P2•T2</b> (DCM). $\lambda_{\text{ex}} = 450$ nm. ....                                                                                                    | <b>S7</b> |

Attached ZIP file: optimised coordinates and energies (B3LYP/6-31G\*/LANL2DZ) for **P2** (model **1d**) at 2.5° increments of butadiyne torsion; ditto for perpendicular and planar diphenyldiacetylene (B3LYP/6-31G\*), tolane (B3LYP/6-31G\*) and **P2** (model **1e**) (B3LYP/6-31G\*). In addition, the optimised excited state geometry of **1e** ( $S_1$  state, TD-B3LYP/6-31G\*) and energy are given.

## UV-Vis extinction coefficients and peak maxima of P2 in DCM/THF/pyridine 10/10/1:

$\lambda_{\text{max}}(\log_{10} \varepsilon)$ : 741 (5.072), 674 (4.891), 588 (4.338), 495 (5.291), 459 (5.592).

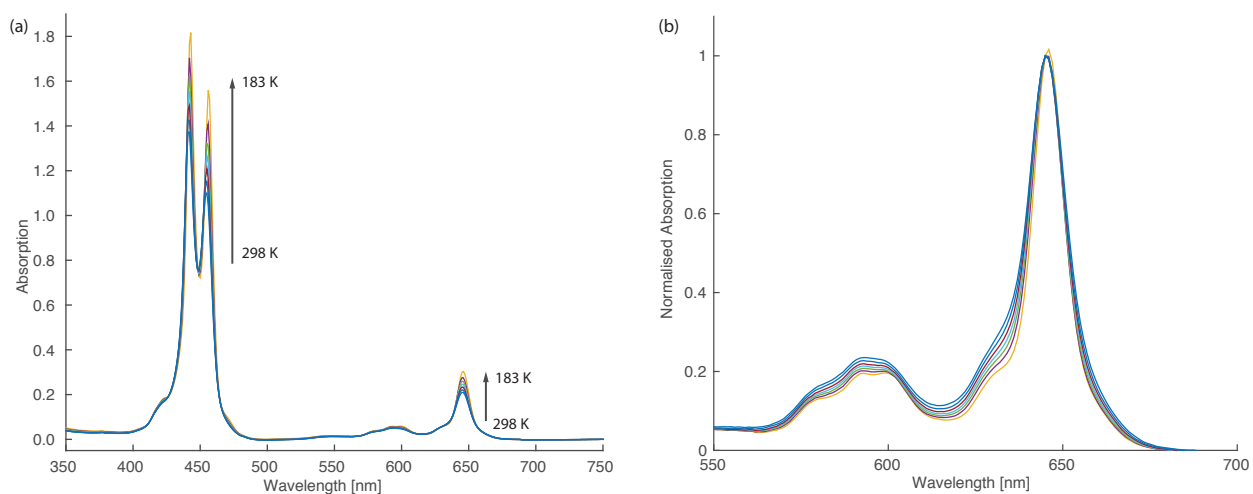

**Figure S1:** VT UV-Vis spectra of monomer **P1** in DCM/THF/pyridine 10/10/1, (a) full spectrum in temperature range 298–77 K (b) expansion of Q-band region in temperature range 298–163 K.

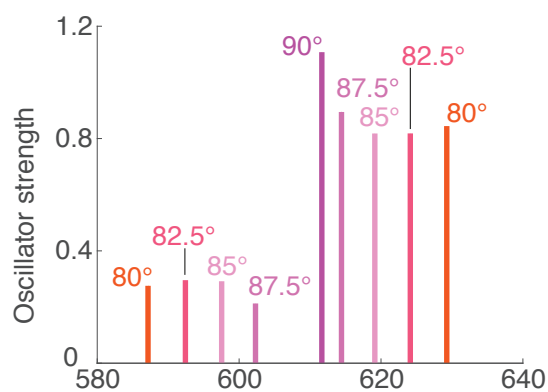

**Figure S2:** TD-DFT (B3LYP/6-31G\*/LANL2DZ) calculated excitation energies and oscillator strengths for **P2** (model **1d**) as a function of inter-porphyrin torsion angle.

Mode 12: 75 cm<sup>-1</sup>

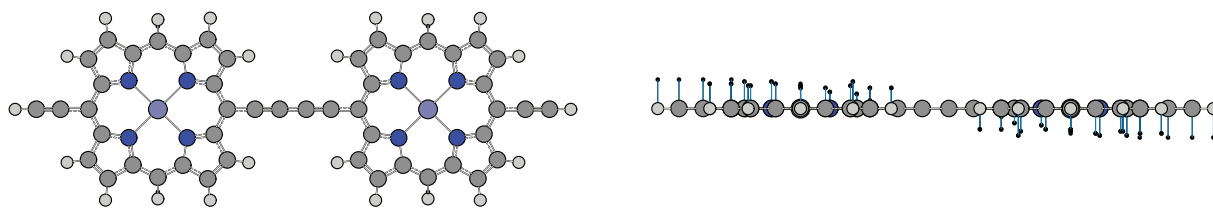

Mode 55: 391 cm<sup>-1</sup>

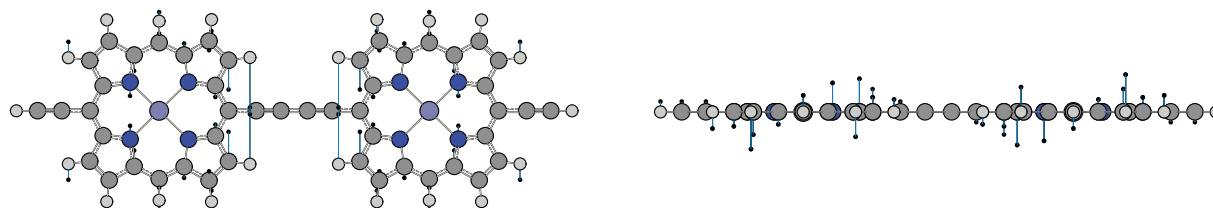

Mode 116: 816 cm<sup>-1</sup>

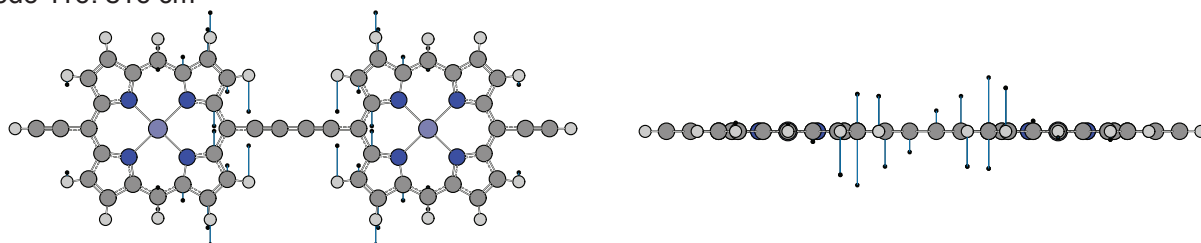

Mode 179: 1345 cm<sup>-1</sup>

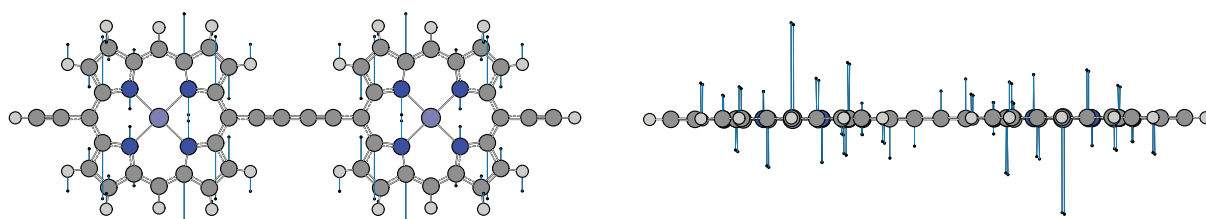

**Figure S3:** Normal modes of S<sub>1</sub> state of **P2** (model **1e**) associated with major vibronic bands (main text Figure 6).

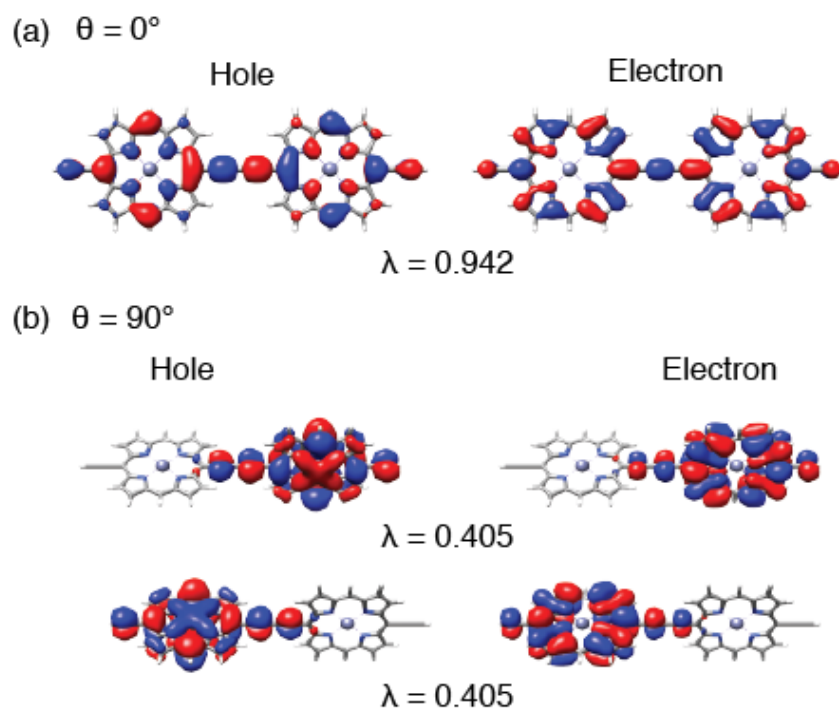

**Figure S4:** Natural transition orbitals (NTOs) for  $S_0$ – $S_1$  transition calculated (TD-B3LYP/6-31G\*) for model **1e**. The eigenvalue associated with each NTO hole/electron pair is shown as  $\lambda$ .

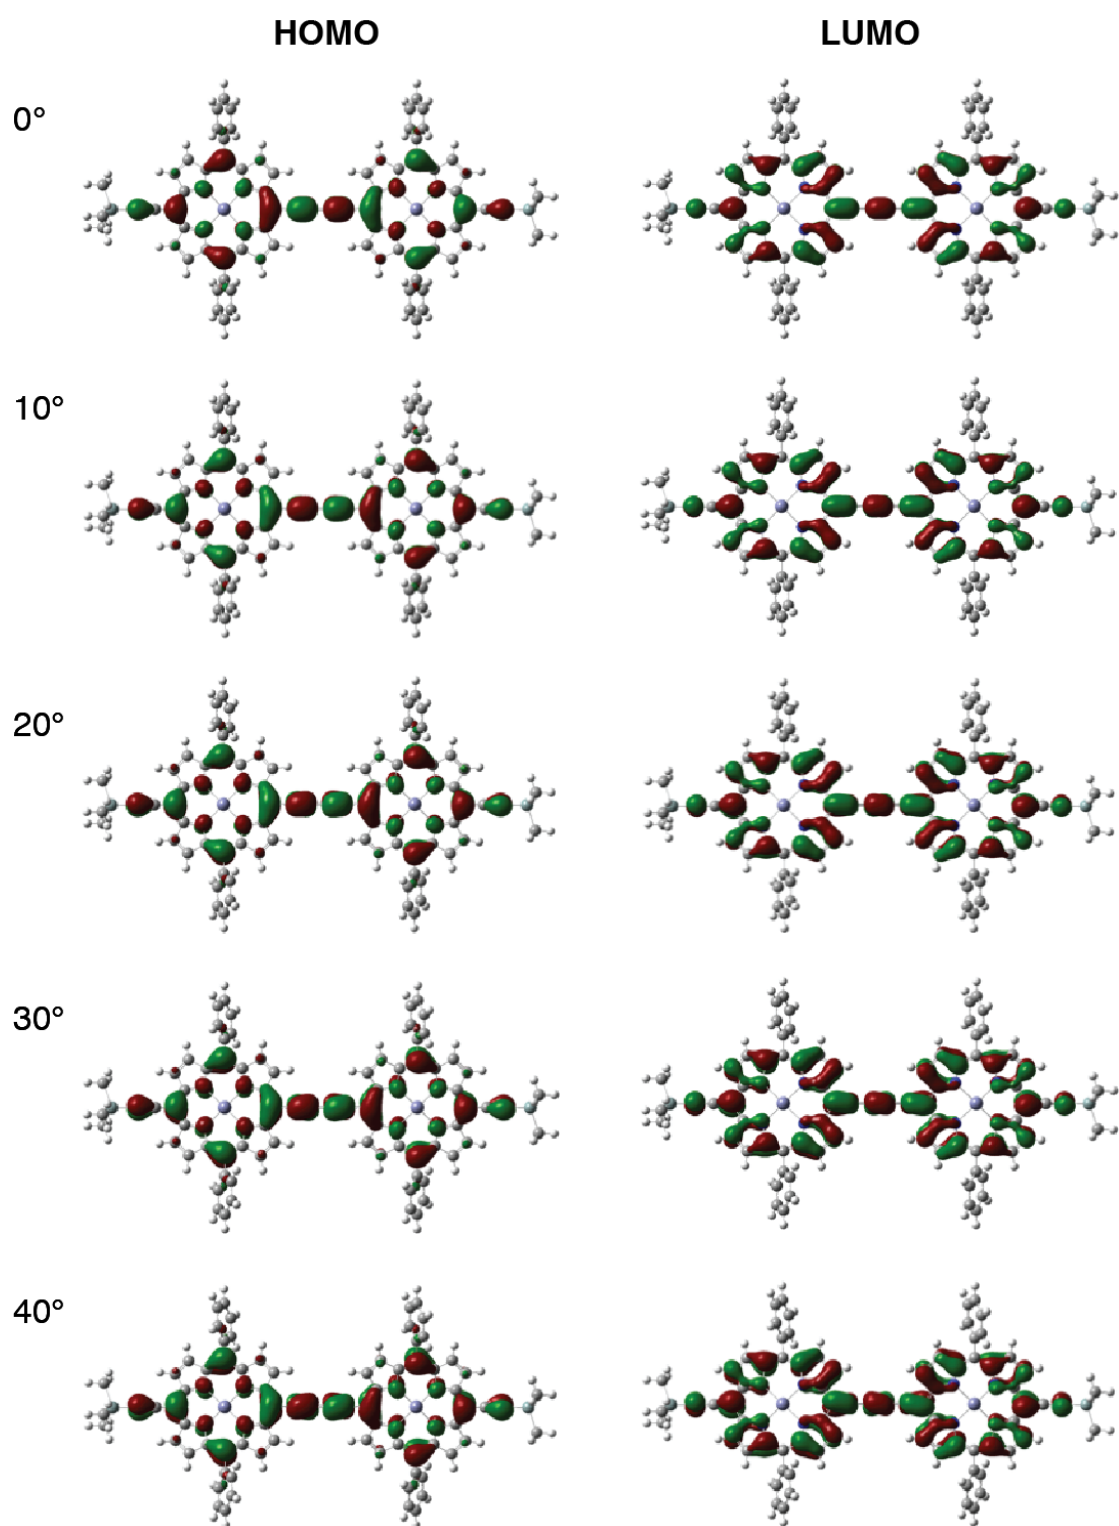

**Figure S5:** DFT (B3LYP/6-31G\*/LANL2DZ) HOMO and LUMO for **P2** (model **1d**) as a function of interporphyrin torsion angle, 0–40°.

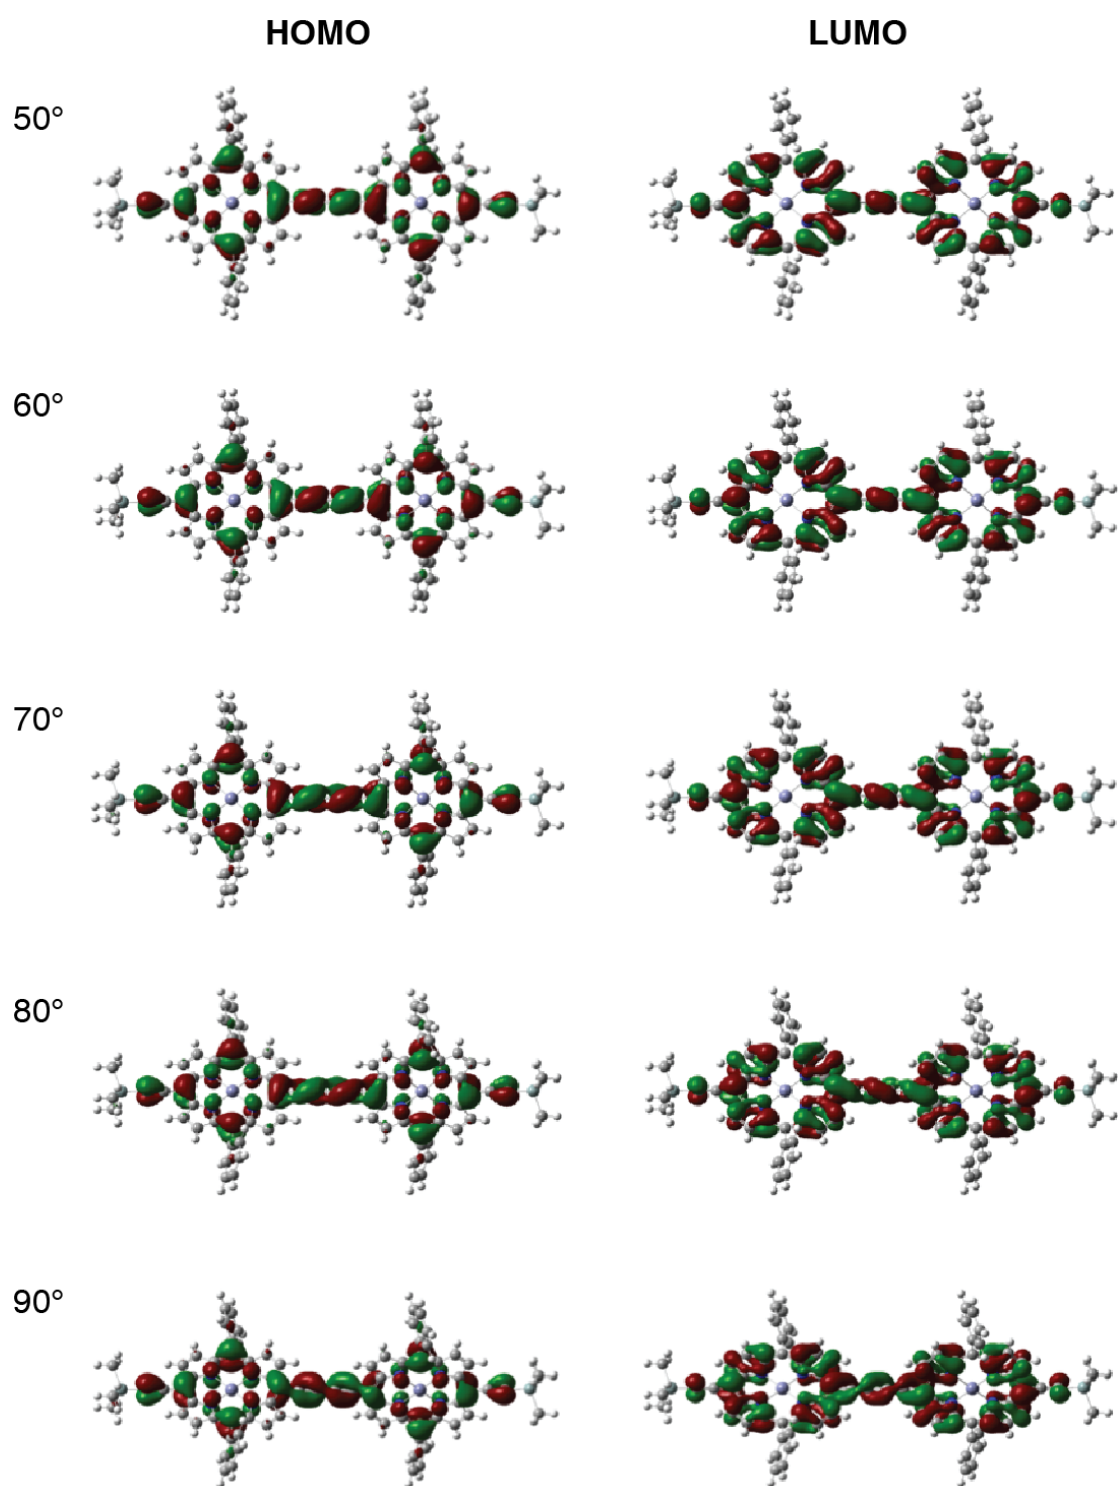

**Figure S6:** DFT (B3LYP/6-31G\*/LANL2DZ) HOMO and LUMO for **P2** (model **1d**) as a function of interporphyrin torsion angle, 50–90°.

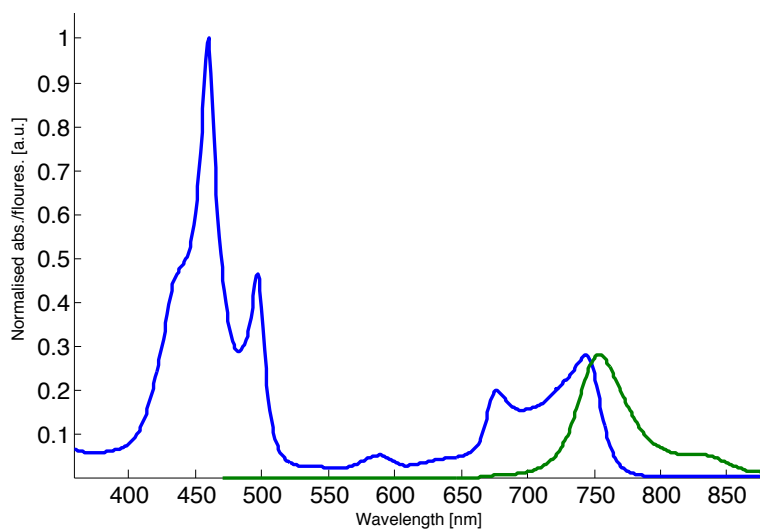

**Figure S7:** Absorption (blue) and fluorescence (green) of **P2** ( $\text{CHCl}_3$  + 1% pyridine).  $\lambda_{\text{ex}} = 450$  nm.

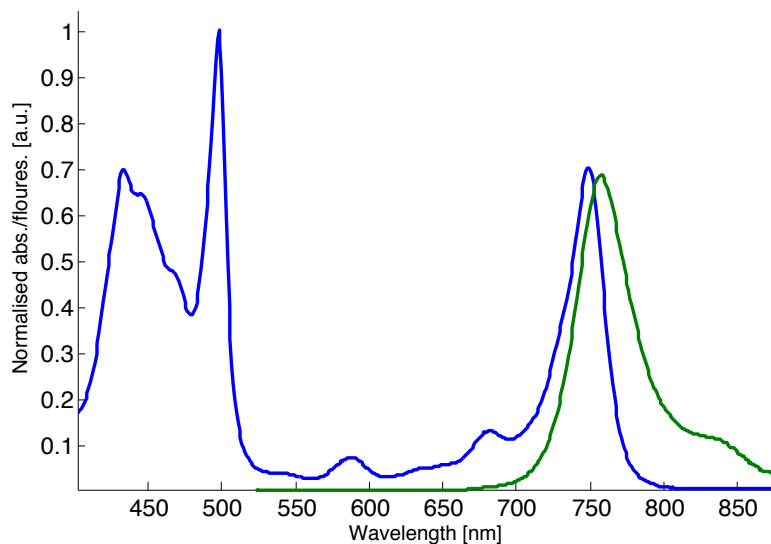

**Figure S8:** Absorption (blue) and fluorescence (green) of **P2•T2** ( $\text{CHCl}_3$ ).  $\lambda_{\text{ex}} = 450$  nm.  $\lambda_{\text{max}}(\log_{10} \epsilon)$ : 749 (5.297), 682 (4.574), 588 (4.324), 498 (5.452), 434 (5.295).

The experimental ratio of extinction coefficients for planar and perpendicular conformers ( $\epsilon_{\parallel}/\epsilon_{\perp}$ ) was estimated by comparing the absorption coefficients of free **P2** (in the presence of pyridine) and complexed **P2•T2** at 750 nm (planar,  $\epsilon_{\parallel}$ ) and 675 nm (perpendicular,  $\epsilon_{\perp}$ ), after subtraction of the vibronic contribution at 675 nm in free **P2**. The vibronic contribution in liquid solution at room temperature is given by the following equation, assuming that in **P2•T2**, there is no perpendicular **P2** (i.e., all absorption at 675 nm arises from the vibronic contribution).

$$x_{\text{vibr}} = \frac{\epsilon_{675 \text{ nm}, T2}}{\epsilon_{750 \text{ nm}, T2}} = 0.171$$

Thus  $\epsilon_{\perp}$  can be estimated by subtracting this vibronic contribution:

$$\epsilon_{\perp, py} = x_{\text{vibr}} \times \epsilon_{675 \text{ nm}, py} = 60960 \text{ M}^{-1} \text{ cm}^{-1}$$

Where  $\epsilon_{py}$  corresponds to spectra recorded in the presence of pyridine, and  $\epsilon_{T2}$  to the complex **P2•T2**. Next we calculate and  $\Delta\epsilon_{\parallel}$ .  $\Delta\epsilon_{\perp}$  was found in the previous step ( $60960 \text{ M}^{-1} \text{ cm}^{-1}$ ), assuming all of the perpendicular **P2** has been planarised.

$$\Delta\epsilon_{\parallel} = \epsilon_{750 \text{ nm}, T2} - \epsilon_{750 \text{ nm}, py} = 103990 \text{ M}^{-1} \text{ cm}^{-1}$$

Thus:

$$\frac{\Delta\epsilon_{\parallel}}{\Delta\epsilon_{\perp}} = \frac{103990}{60960} = 1.7059$$
